# Supplementary material for: The Effect of Daylight-Saving Time on Percutaneous Coronary Intervention Outcomes in Acute Coronary Syndrome Patients—Data from the Polish National Registry of Percutaneous Coronary Interventions (ORPKI) in the Years 2014–2022
Source: MDPI journal article supplement (doi:10.3390/jcdd10090375), 2023-09-01
Supplement: s1 [file s1]

Table S1. Factors affecting the occurrence of ACS.

| Variable           | Sunday – Tuesday (3 days)<br>Summer to Winter |         | Sunday – Saturday (7<br>days) Summer to Winter |         | Sunday – Saturday (7<br>days) Any |         |
|--------------------|-----------------------------------------------|---------|------------------------------------------------|---------|-----------------------------------|---------|
|                    | IRR (95% CI)                                  | P value | IRR (95% CI)                                   | P value | IRR (95% CI)                      | P value |
| Age, years         | 0.98 (0.97 – 0.99)                            | < 0.001 | 0.98 (0.97 – 0.99)                             | < 0.001 | 0.98 (0.97 – 0.99)                | < 0.001 |
| Gender<br>(male)   | 1.03 (0.81 – 1.31)                            | 0.8     | 1.04 (0.82 – 1.32)                             | 0.76    | 1.04 (0.82 – 1.32)                | 0.76    |
| Weight, kg         | 0.95 (0.94 – 0.95)                            | < 0.001 | 0.95 (0.94 – 0.95)                             | < 0.001 | 0.95 (0.94 – 0.95)                | < 0.001 |
| Diabetes           | 1.53 (1.14 – 2.04)                            | < 0.001 | 1.52 (1.14 – 2.03)                             | 0.004   | 1.52 (1.14 – 2.03)                | 0.004   |
| Previous<br>Stroke | 1.07 (0.51 – 2.25)                            | 0.87    | 1.05 (0.5 – 2.22)                              | 0.9     | 1.05 (0.5 – 2.22)                 | 0.9     |
| Previous MI        | 0.71 (0.52 – 0.97)                            | 0.03    | 0.71 (0.52 – 0.97)                             | 0.03    | 0.71 (0.52 – 0.97)                | 0.03    |
| Previous PCI       | 0.75 (0.54 – 1.04)                            | 0.08    | 0.75 (0.54 – 1.03)                             | 0.08    | 0.75 (0.54 – 1.03)                | 0.08    |
| Previous<br>CABG   | 9.94 (6.0 – 16.5)                             | < 0.001 | 9.87 (5.97 – 16.34)                            | < 0.001 | 9.87 (5.97 – 16.34)               | < 0.001 |
| Smoking<br>status  | 0.1 (0.07 – 0.13)                             | < 0.001 | 0.1 (0.07 – 0.13)                              | < 0.001 | 0.1 (0.07 – 0.13)                 | < 0.001 |
| Psoriasis          | 0.09 (0.1 – 0.63)                             | 0.02    | 0.09 (0.01 – 0.63)                             | 0.015   | 0.09 (0.01 – 0.63)                | 0.02    |
| Hypertension       | 4.75 (3.77 – 5.99)                            | < 0.001 | 4.75 (3.77 – 5.98)                             | < 0.001 | 4.75 (3.77 – 5.98)                | < 0.001 |
| Kidney<br>disease  | 0.28 (0.16 – 0.48)                            | < 0.001 | 0.28 (0.16 – 0.48)                             | < 0.001 | 0.28 (0.16 – 0.48)                | < 0.001 |
| COPD               | 0.08 (0.04 – 0.14)                            | < 0.001 | 0.08 (0.04 – 0.14)                             | < 0.001 | 0.08 (0.04 – 0.14)                | < 0.001 |

Abbreviations: ACS, acute coronary syndrome; CABG, coronary artery bypass grafting; COPD, chronic obstructive pulmonary disease; IRR, incidence rate ratio; MI, myocardial infarction; PCI, percutaneous coronary intervention.

Table S2. Factors affecting the occurrence of NSTEMI.

| Variable           | Sunday – Saturday (7 days)<br>Summer to Winter |         |
|--------------------|------------------------------------------------|---------|
|                    | IRR (95% CI)                                   | P value |
| Age, years         | 0.9985 (0.99 – 1.00)                           | 0.62    |
| Gender<br>(male)   | 1.08 (0.95 – 1.23)                             | 0.25    |
| Weight, kg         | 0.98 (0.98 – 0.98)                             | < 0.001 |
| Diabetes           | 1.23 (1.06 – 1.43)                             | 0.007   |
| Previous<br>Stroke | 1.08 (0.8 – 1.46)                              | 0.61    |
| Previous MI        | 1.36 (1.14 – 1.62)                             | 0.001   |
| Previous PCI       | 0.45 (0.39 – 0.53)                             | < 0.001 |
| Previous<br>CABG   | 1.12 (0.85 – 1.47)                             | 0.42    |
| Smoking<br>status  | 0.74 (0.64 – 0.85)                             | < 0.001 |
| Psoriasis          | 0.63 (0.24 – 1.65)                             | 0.34    |
| Hypertension       | 1.39 (1.22 – 1.58)                             | < 0.001 |
| Kidney<br>disease  | 0.91 (0.73 – 1.14)                             | 0.43    |
| COPD               | 0.23 (0.17 – 0.31)                             | < 0.001 |

Abbreviations: ACS, acute coronary syndrome; CABG, coronary artery bypass grafting; COPD, chronic obstructive pulmonary disease; IRR, incidence rate ratio; MI, myocardial infarction; PCI, percutaneous coronary intervention.

Table S3. Factors affecting the occurrence of UA.

| Variable        | Sunday – Saturday (7 days)<br>Summer to Winter |         | Sunday – Saturday (7 days)<br>Any |         |
|-----------------|------------------------------------------------|---------|-----------------------------------|---------|
|                 | IRR (95% CI)                                   | P value | IRR (95% CI)                      | P value |
| Age, years      | 0.99 (0.98 – 1.01)                             | 0.28    | 0.99 (0.98 – 1.0)                 | 0.29    |
| Gender (male)   | 1.09 (0.82 – 1.45)                             | 0.54    | 1.1 (0.83 – 1.46)                 | 0.5     |
| Weight, kg      | 0.97 (0.96 – 0.97)                             | < 0.001 | 0.96 (0.96 – 0.97)                | < 0.001 |
| Diabetes        | 1.08 (0.78 – 1.5)                              | 0.66    | 1.07 (0.77 – 1.49)                | 0.67    |
| Previous Stroke | 2.11 (0.89 – 4.99)                             | 0.09    | 2.06 (0.87 – 4.86)                | 0.1     |
| Previous MI     | 0.3 (0.21 – 0.43)                              | < 0.001 | 0.3 (0.21 – 0.43)                 | < 0.001 |
| Previous PCI    | 0.79 (0.57 – 1.08)                             | 0.14    | 0.78 (0.56 – 1.07)                | 0.12    |
| Previous CABG   | 5.3 (3.04 – 9.23)                              | < 0.001 | 5.29 (3.03 – 9.22)                | < 0.001 |
| Smoking status  | 0.29 (0.21 – 0.41)                             | < 0.001 | 0.29 (0.21 – 0.41)                | < 0.001 |
| Psoriasis       | 0.1 (0.01 – 0.97)                              | 0.047   | 0.1 (0.01 – 0.98)                 | 0.048   |
| Hypertension    | 3.46 (2.68 – 4.46)                             | < 0.001 | 3.47 (2.69 – 4.48)                | < 0.001 |
| Kidney disease  | 0.4 (0.21 – 0.74)                              | 0.004   | 0.4 (0.22 – 0.74)                 | 0.004   |
| COPD            | 0.25 (0.12 – 0.53)                             | < 0.001 | 0.25 (0.12 – 0.54)                | < 0.001 |

Abbreviations: ACS, acute coronary syndrome; CABG, coronary artery bypass grafting; COPD, chronic obstructive pulmonary disease; IRR, incidence rate ratio; MI, myocardial infarction; PCI, percutaneous coronary intervention.
